# Supplementary material for: Loss-of-Function of xpc Sensitizes Zebrafish to Ultraviolet Irradiation
Source: MDPI journal article supplement (doi:10.3390/fishes8040191), 2023-04-03
Supplement: s1 [file s1]

**B**

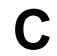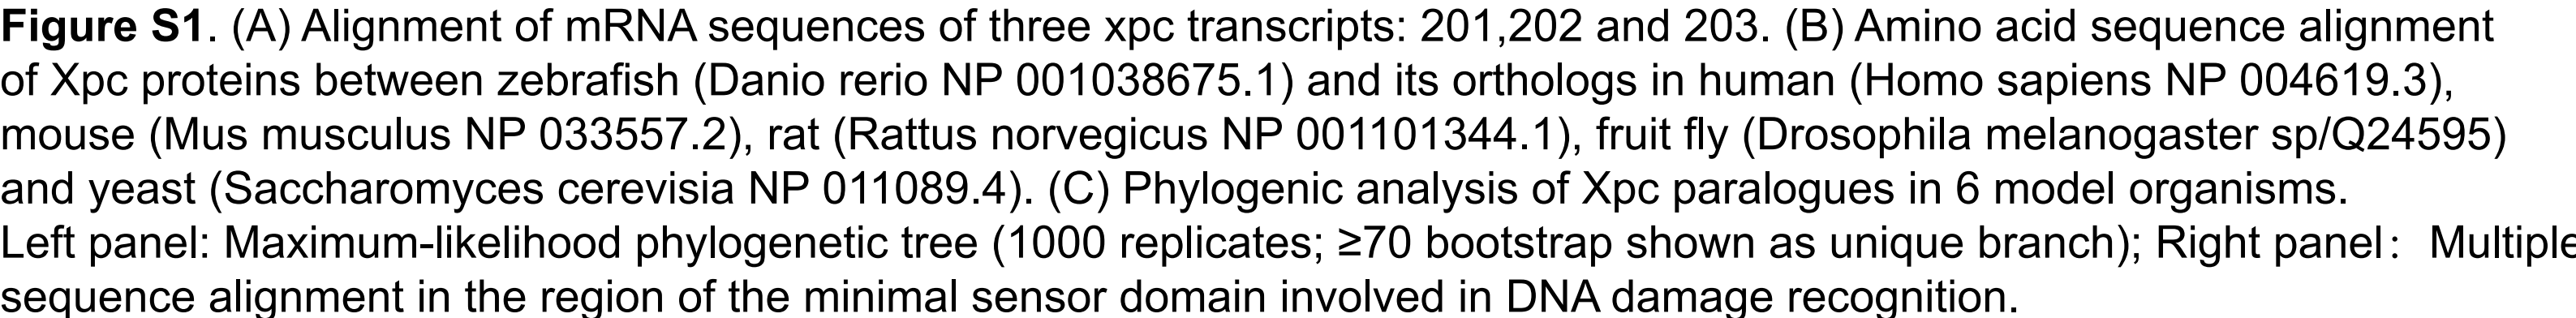

**Figure S1.** (A) Alignment of mRNA sequences of three xpc transcripts: 201,202 and 203. (B) Amino acid sequence alignment of Xpc proteins between zebrafish (*Danio rerio* NP 001038675.1) and its orthologs in human (*Homo sapiens* NP 004619.3), mouse (*Mus musculus* NP 033557.2), rat (*Rattus norvegicus* NP 001101344.1), fruit fly (*Drosophila melanogaster* sp/Q24595) and yeast (*Saccharomyces cerevisia* NP 011089.4). (C) Phylogenic analysis of Xpc paralogues in 6 model organisms. Left panel: Maximum-likelihood phylogenetic tree (1000 replicates;  $\geq 70$  bootstrap shown as unique branch); Right panel: Multiple sequence alignment in the region of the minimal sensor domain involved in DNA damage recognition.

**Figure S1.** (A) Alignment of mRNA sequences of three xpc transcripts: 201,202 and 203. (B) Amino acid sequence alignment of Xpc proteins between zebrafish (*Danio rerio* NP 001038675.1) and its orthologs in human (*Homo sapiens* NP 004619.3), mouse (*Mus musculus* NP 033557.2), rat (*Rattus norvegicus* NP 001101344.1), fruit fly (*Drosophila melanogaster* sp/Q24595) and yeast (*Saccharomyces cerevisia* NP 011089.4). (C) Phylogenic analysis of Xpc paralogues in 6 model organisms. Left panel: Maximum-likelihood phylogenetic tree (1000 replicates;  $\geq 70$  bootstrap shown as unique branch); Right panel: Multiple sequence alignment in the region of the minimal sensor domain involved in DNA damage recognition.



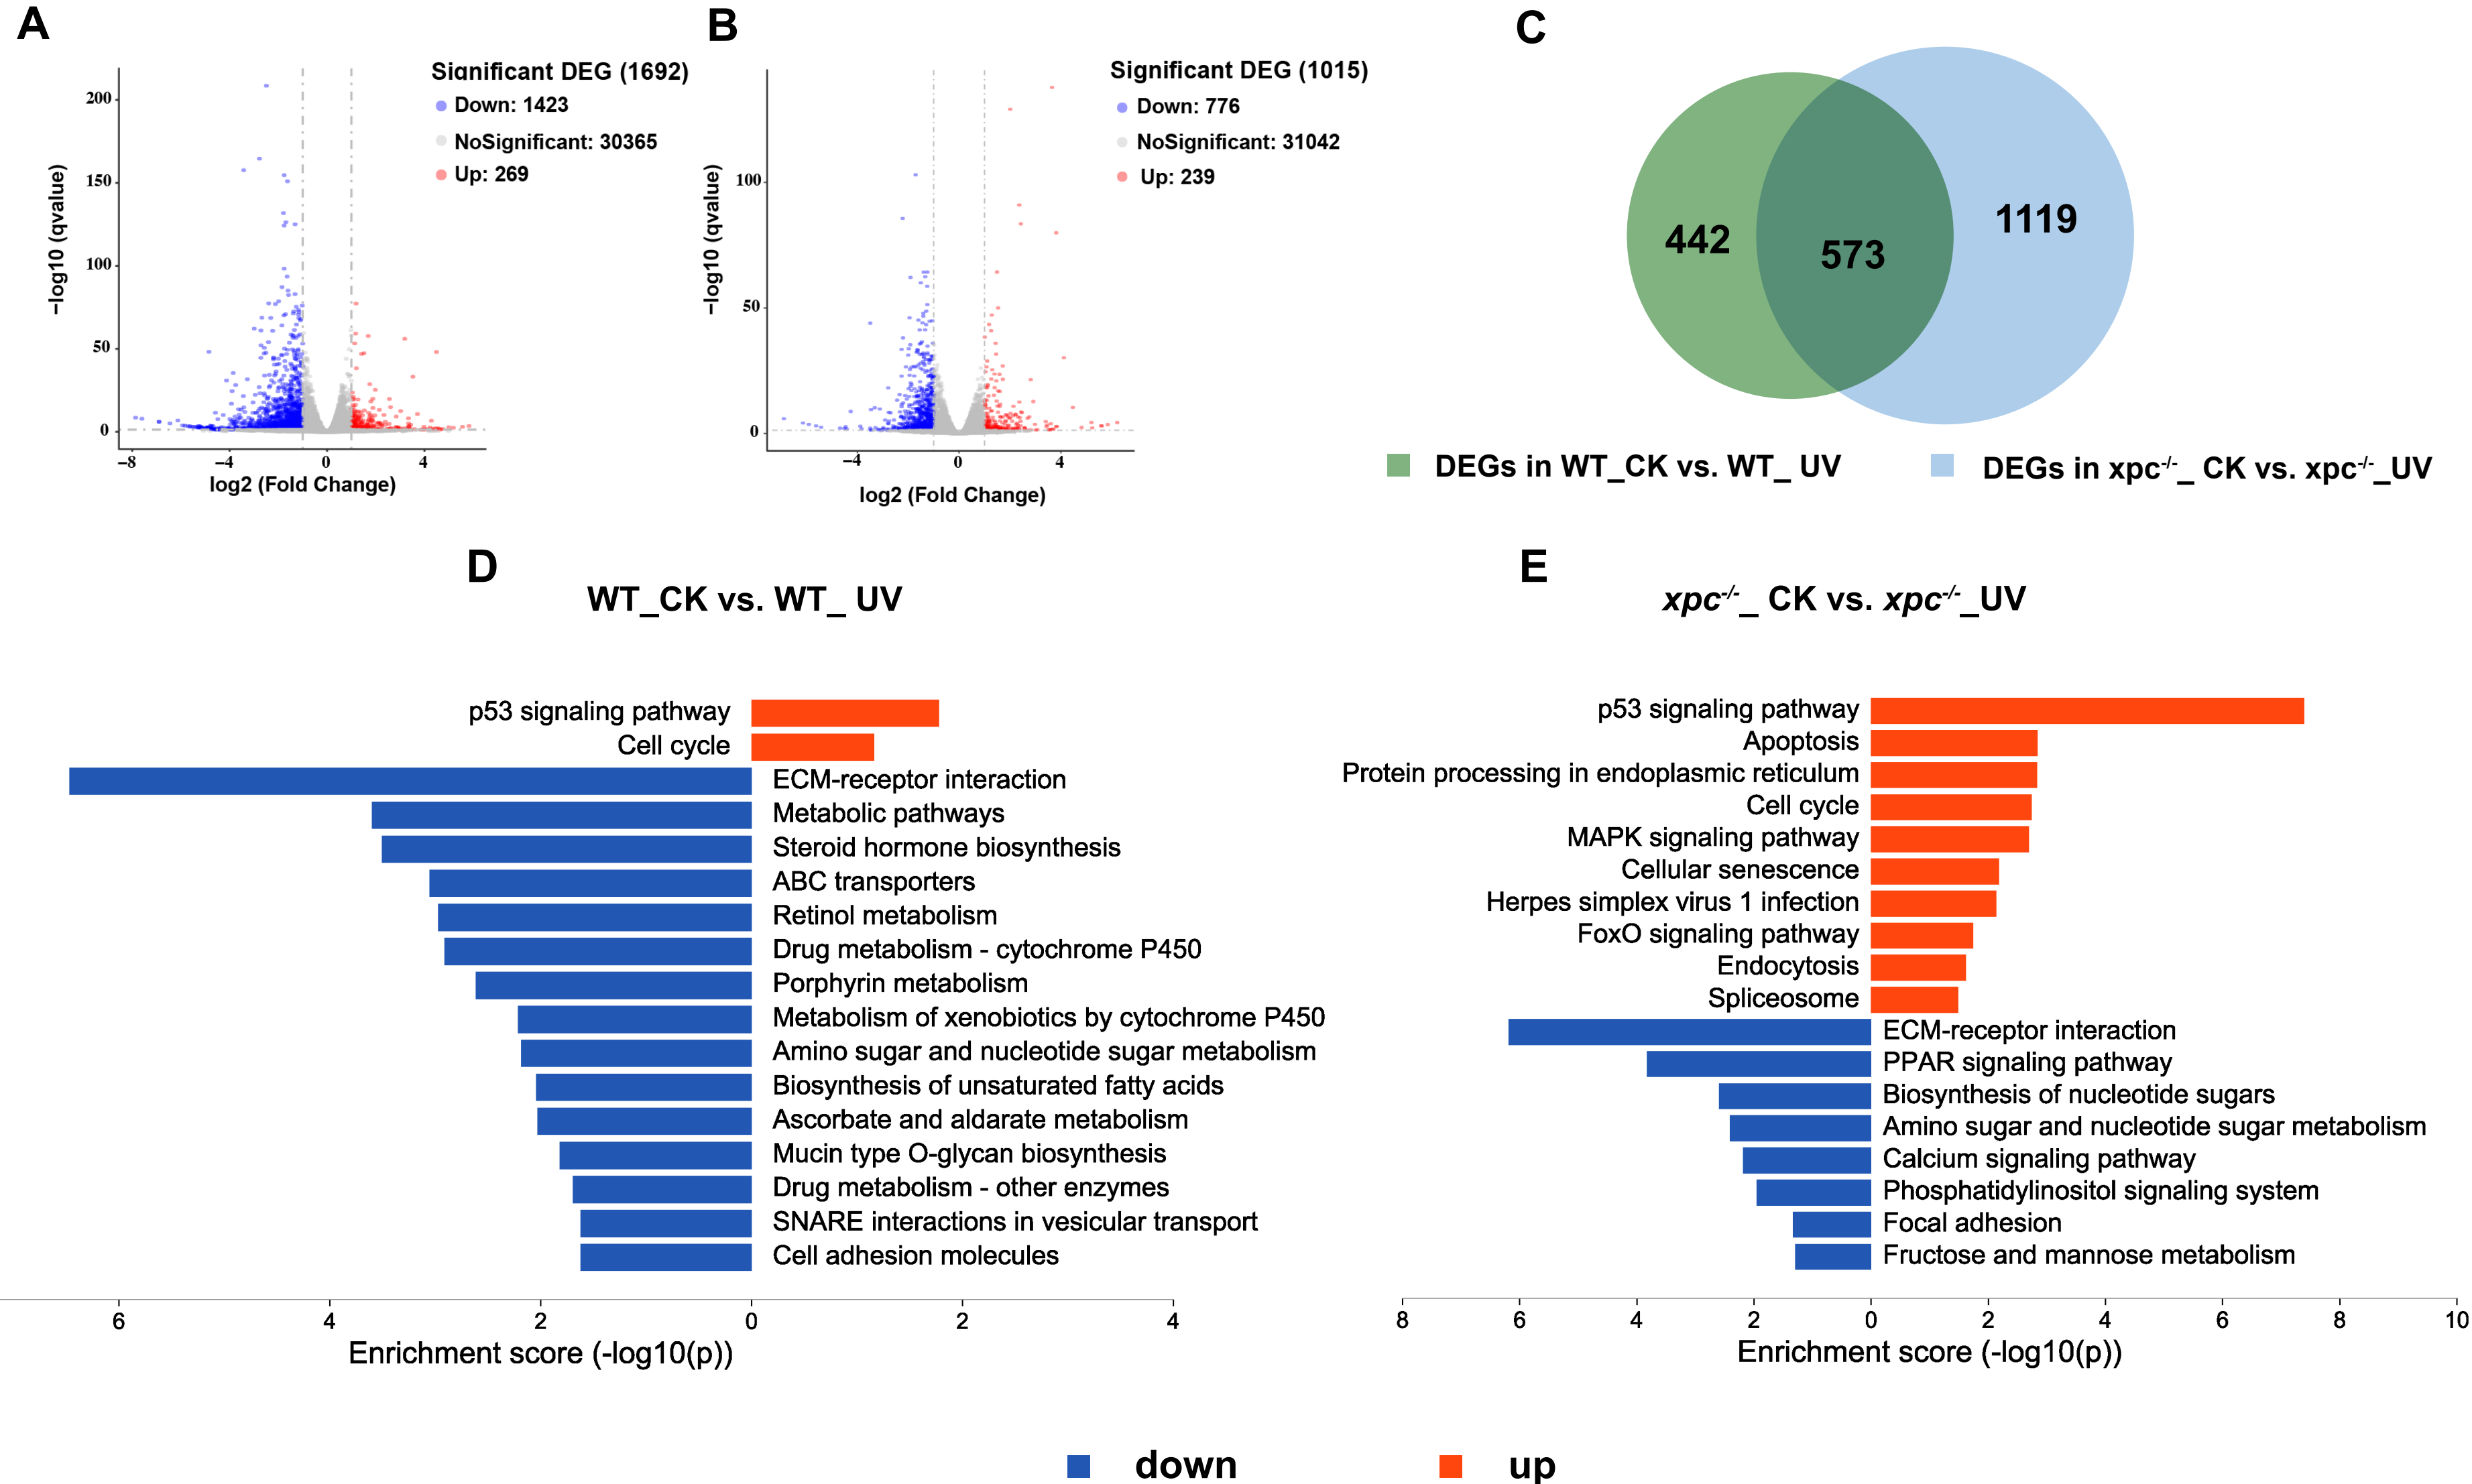

**Figure S2.** Transcriptome analysis reveals that p53 signaling pathway is the top upregulated pathway in both UV treated WT and UV treated *xpc*<sup>-/-</sup> embryos compared to corresponding untreated controls. (A,B) Volcano plots showing the DEGs of WT\_CK verse WT\_UV and *xpc*<sup>-/-</sup>\_CK verse *xpc*<sup>-/-</sup>\_UV. (C) Venn diagram showing the distribution of DEGs among two comparisons: WT\_CK verse WT\_UV, *xpc*<sup>-/-</sup>\_CK verse *xpc*<sup>-/-</sup>\_UV. (D,E) KEGG pathway analysis of DEGs in the comparisons of WT\_CK verse WT\_UV and *xpc*<sup>-/-</sup>\_CK verse *xpc*<sup>-/-</sup>\_UV.

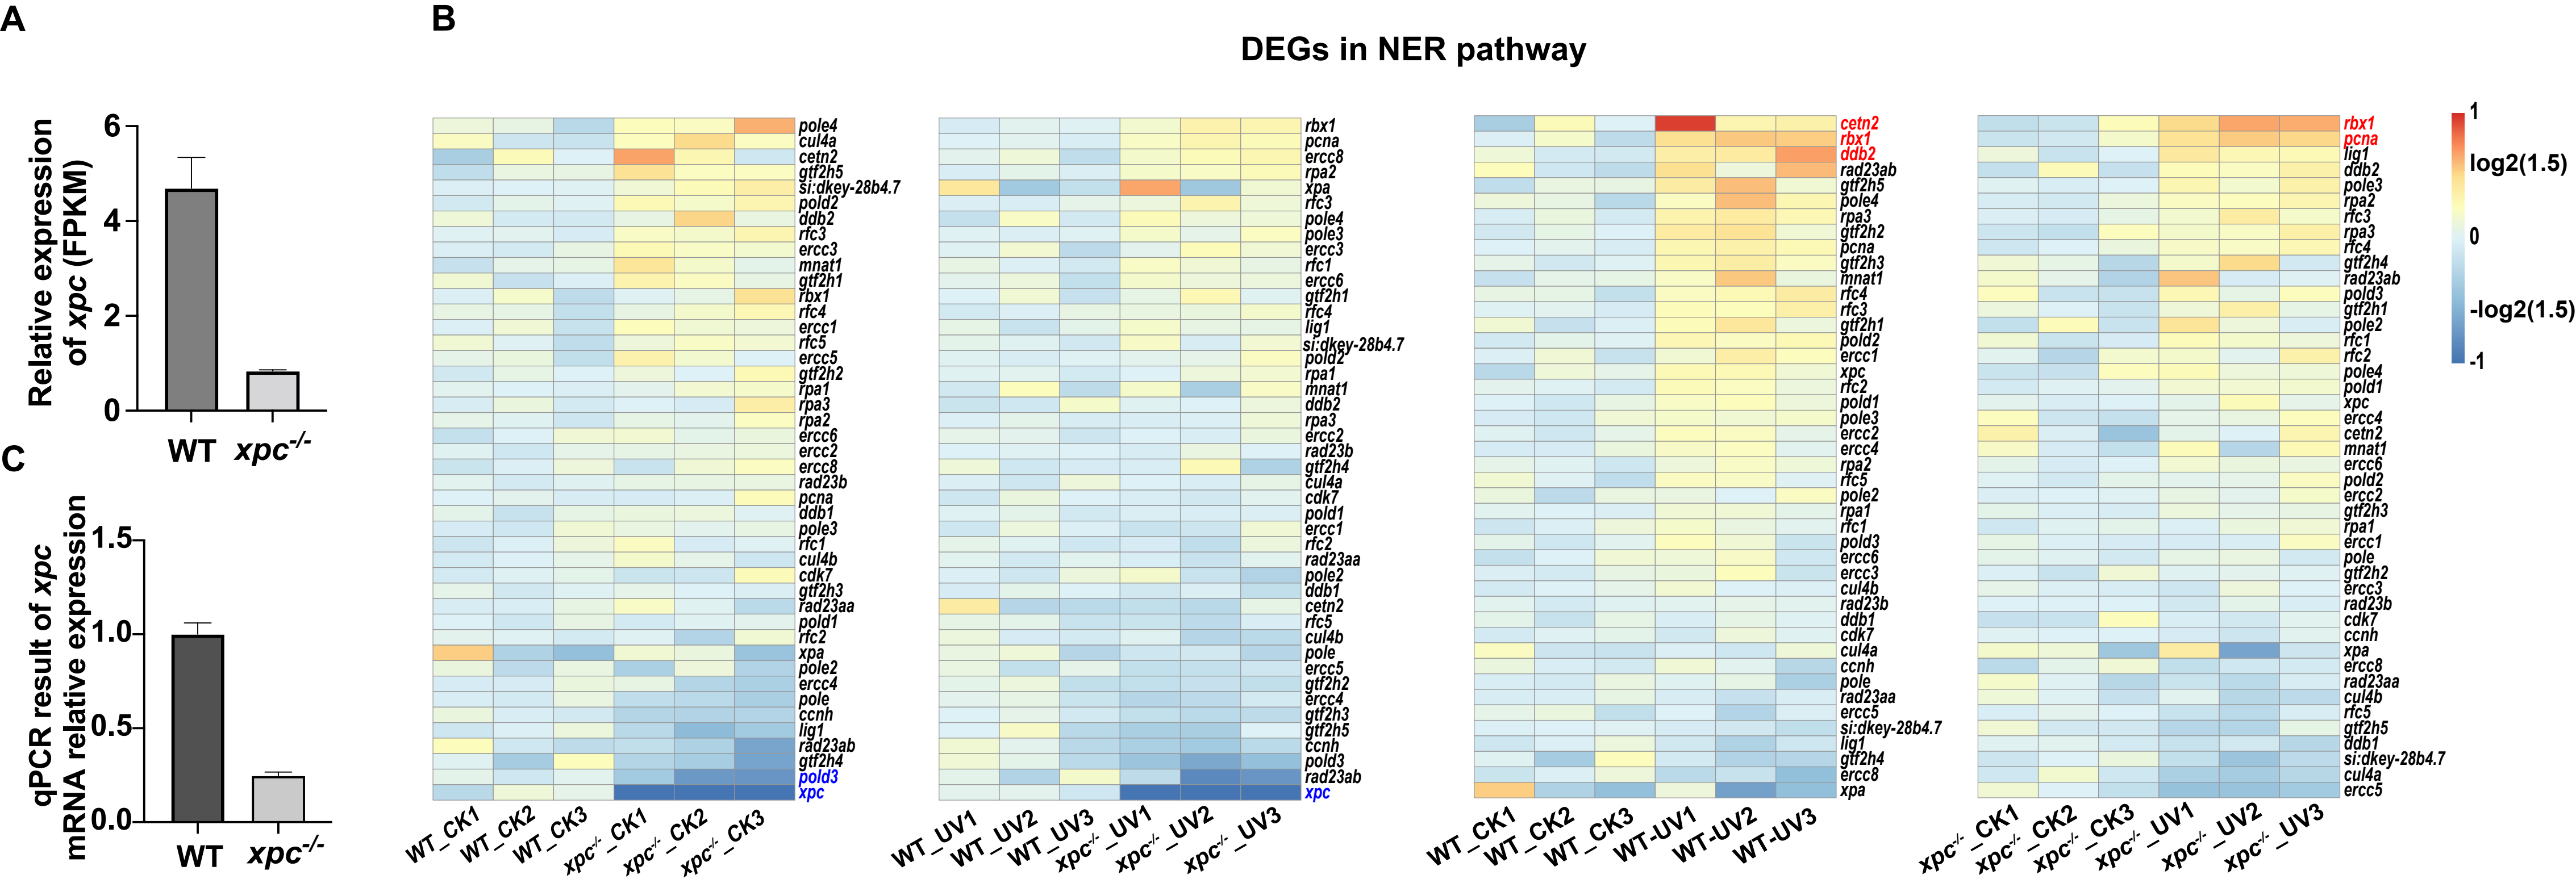

**Figure S3.** The influence of UV irradiation and *xpc* knockout on the expression of genes involved in NER pathway. (A) Relative expression level of *xpc* in untreated WT and untreated *xpc*<sup>-/-</sup> mutant embryos. (B) Heatmaps showing the expression changes of 44 NER pathway genes in four comparisons: between WT\_CK and *xpc*<sup>-/-</sup>\_CK, between WT\_UV and *xpc*<sup>-/-</sup>\_UV, between WT\_CK and WT\_UV, between *xpc*<sup>-/-</sup>\_CK vs. *xpc*<sup>-/-</sup>\_UV. Gene names in blue: ( $\log_2 \leq -0.58$ ,  $P < 0.05$ ); Gene names in red: ( $\log_2 \geq 0.58$ ,  $P < 0.05$ ). (C) Validation of *xpc* expression in by qRT-PCR.

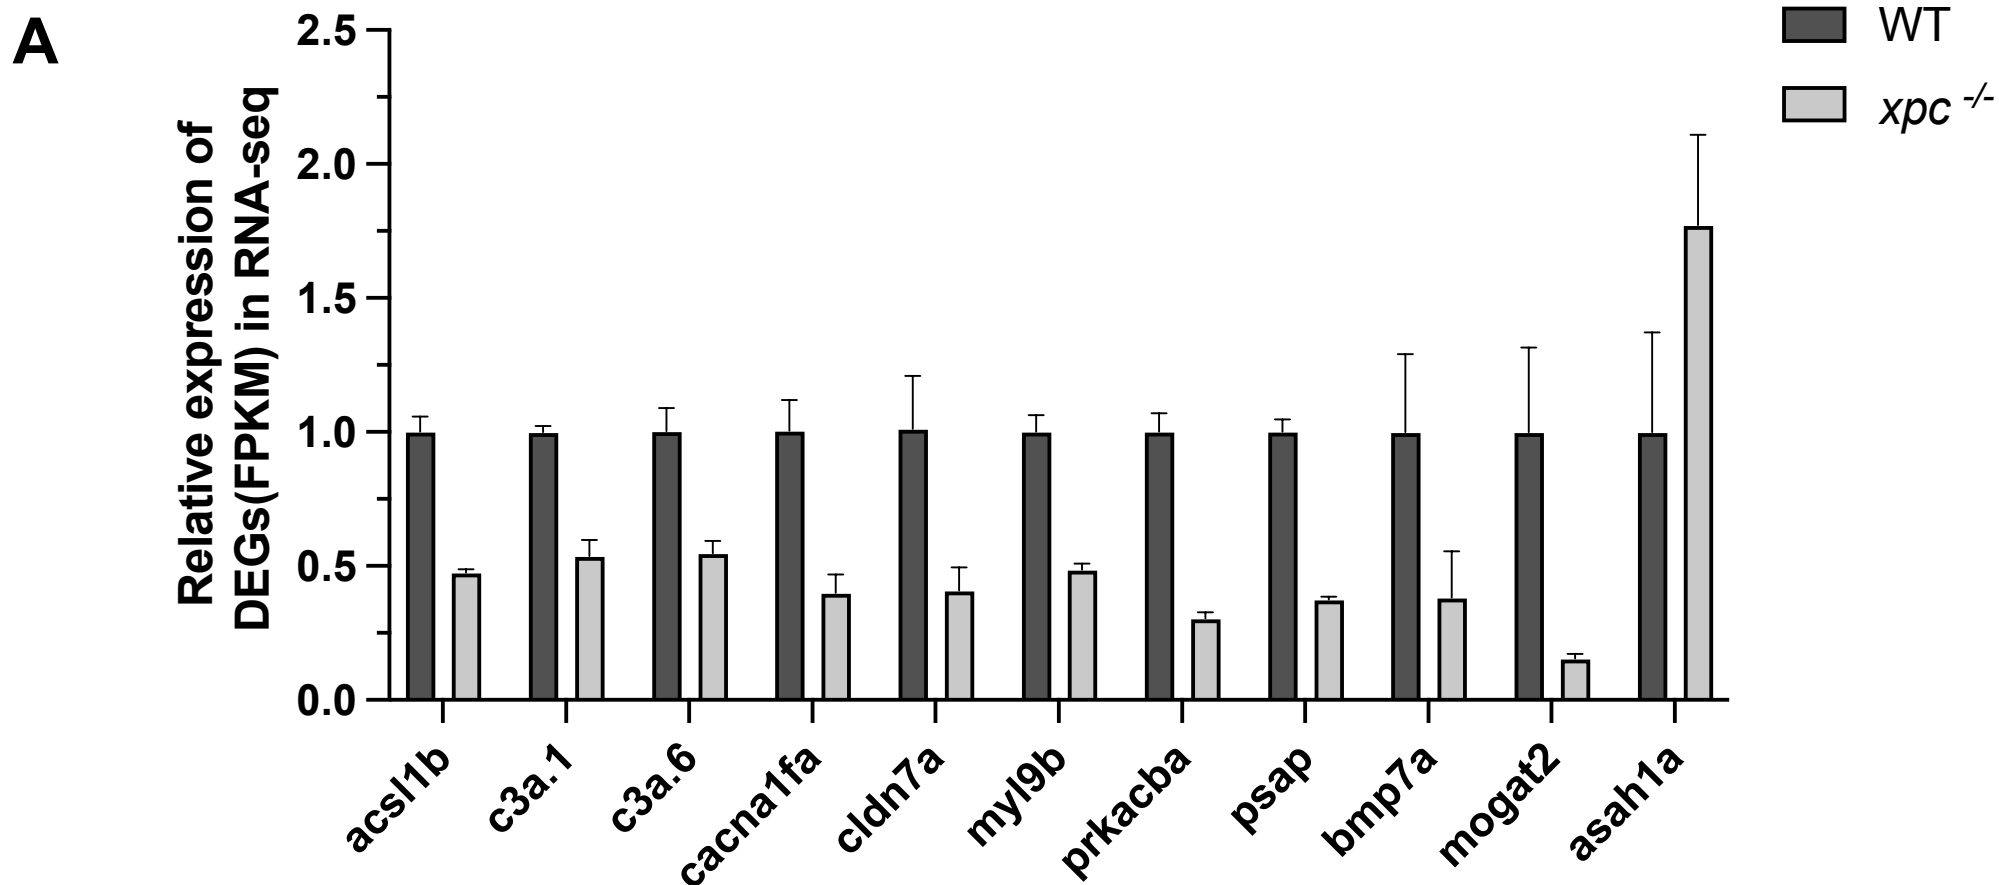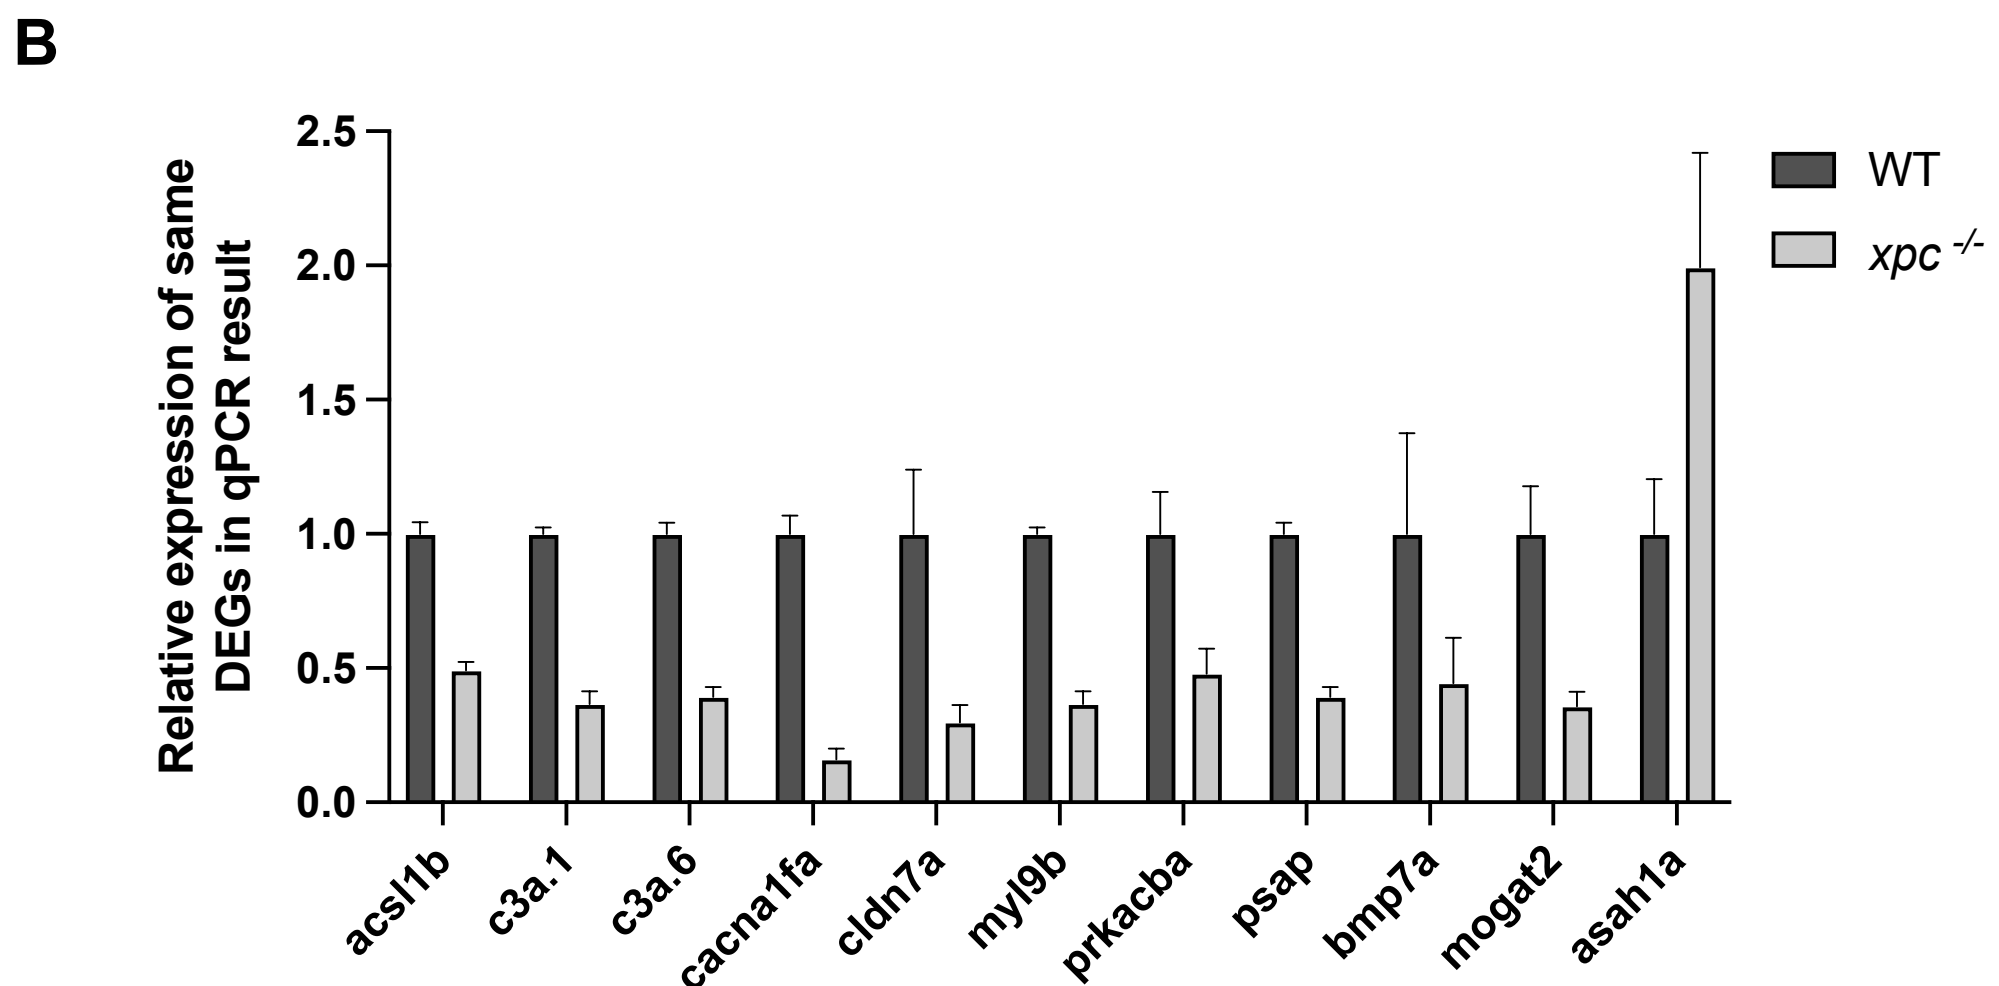

**Figure S4.** Validation of DEGs in RNA-seq between WT and  $xpc^{-/-}$  mutant embryos by qRT-PCR. To evaluate the quality of RNA-seq data, 11 genes were randomly selected from the DEGs between WT and  $xpc^{-/-}$  mutant embryos. The relative expression of 11 DEGs (FPKM) from RNA-seq was presented in A. The results of qRT-PCR for the 11 genes were present.

Supplement Table S1. List of the 379 DEGs in WT vs. *xpc*<sup>-/-</sup> of RNAseq.  
(Genes in red have been reported to be differentially expressed in cancer tissues)

| Down regulated DEGs |                    |                   |                    | Up regulated DEGs     |                   |
|---------------------|--------------------|-------------------|--------------------|-----------------------|-------------------|
| GeneSymbol          | GeneSymbol         | GeneSymbol        | GeneSymbol         | GeneSymbol            | GeneSymbol        |
| <b>alcf</b>         | si:ch73-19616.5    | myl9b             | znf1090            | <b>fancf</b>          | si:ch211-161h7.8  |
| <b>ppm1f</b>        | dnah9l             | tmem30c           | si:dkey-228a15.1   | <b>pycr3</b>          | znf1065           |
| <b>hnfla</b>        | dennd10            | myh11a            | col18a1b           | <b>pon1</b>           | tmem138           |
| <b>hsc70</b>        | fhod3a             | cacna1fa          | BX005461.1         | <b>thy1</b>           | znf1066           |
| <b>cideb</b>        | si:dkey-172m14.2   | si:ch211-288d18.1 | si:dkey-22h13.3    | <b>gnngt1</b>         | si:dkey-90l23.1   |
| <b>c3a.1</b>        | trpc6b             | adal              | BX322618.1         | <b>anxa4</b>          | znf1137           |
| <b>lin7a</b>        | si:ch211-195h23.3  | ctss2.2           | si:dkey-61p9.11    | <b>st8sia5</b>        | fthl31            |
| <b>psap</b>         | tsen15             | pdlim3b           | CR391963.1         | <b>s100s</b>          | BX649490.2        |
| <b>abcc2</b>        | zgc:162608         | iqch              | CU062633.1         | <b>pm20d1.1</b>       | frt92             |
| <b>gad2</b>         | zgc:114181         | rdh1              | opn1mw1            | <b>efcab11</b>        | si:dkey-54j5.2    |
| <b>slc27a4</b>      | hce2l2             | bmp7a             | CR753876.1         | <b>tmem244</b>        | AL928650.3        |
| <b>rsph14</b>       | pcgf5a             | mapre3a           | si:dkey-4c15.16    | <b>amd1</b>           | im:7152348        |
| <b>msrb2</b>        | si:dkey-253d23.2   | fbp1b             | CR848844.1         | <b>OTUD7A</b>         | si:dkey-33c14.7   |
| <b>mogat2</b>       | znf1085            | zgc:153921        | BX548024.2         | <b>tapbpl</b>         | si:dkey-188h10.3  |
| <b>plg</b>          | si:ch211-231l0.3   | zgc:92040         | CR753876.1         | <b>acyp1</b>          | CT573392.1        |
| <b>ap5m1</b>        | zgc:174698         | cyp2p9            | znf998             | <b>chst6</b>          | si:ch1073-190k2.1 |
| <b>etnpp1</b>       | si:dkey-258f14.3   | golt1ba           | spef2              | <b>opa3</b>           | si:dkeyp-86c4.1   |
| <b>med28</b>        | si:dkey-247i3.1    | noxred1           | si:dkey-14o6.4     | <b>prss12</b>         | si:dkey-237m9.1   |
| <b>ddit4</b>        | zgc:195170         | stxbp6l           | CABZ01044277.1     | <b>GRB14</b>          | CU280645.1        |
| <b>c4b</b>          | CR385050.1         | ldlra             | znf1156            | <b>mos</b>            | CU633479.1        |
| <b>havcr1</b>       | tmem260            | kidins220a        | si:dkey-238i5.3    | <b>tnfrsf1b</b>       | zgc:153293        |
| <b>gpx3</b>         | zgc:174310         | thns12            | znf1040            | <b>ifi35</b>          | znf1070           |
| <b>c3a.6</b>        | zgc:171686         | fkbp1ab           | CABZ01034698.1     | <b>dok2</b>           | CT737123.1        |
| <b>trmu</b>         | zgc:173726         | zgc:173443        | znf1087            | <b>gcga</b>           | znf1109           |
| <b>tagln</b>        | si:ch73-27e22.3    | CABZ01090041.1    | znf1122            | <b>phlda1</b>         | BX088718.2        |
| <b>slc47a1</b>      | si:dkey-184p18.2   | drll2             | zgc:174275         | <b>spink2.1</b>       | ARHGAP44          |
| <b>dnajb5</b>       | CR626907.1         | si:dkeyp-92c9.2   | si:dkey-16p6.1     | <b>cib1</b>           | CR450832.1        |
| <b>lpcat2</b>       | drl                | lcp2b             | BX321870.2         | <b>e2f1</b>           | si:dkeyp-44b5.5   |
| <b>adhfe1</b>       | si:dkeyp-75b4.10   | cldn7a            | si:ch211-256e16.11 | <b>pyroxd1</b>        | znf1053           |
| <b>gde1</b>         | prss59.1           | s100a10a          | znf1097            | <b>napga</b>          | znf1102           |
| <b>steap4</b>       | slc47a4            | lgals2b           | CABZ01117503.1     | si:ch211-59h6.1       | wu:fc30c06        |
| <b>enpep</b>        | si:ch211-149l1.2   | zgc:153921        | si:dkey-16b10.1    | <b>cdh7b</b>          | BX649453.1        |
| <b>serping1</b>     | cyp2x6             | chmp5a            | zgc:113363         | <b>cyb561a3b</b>      | si:dkey-35h6.1    |
| <b>slc39a1</b>      | si:dkey-253d23.4   | lrp2bp            | si:dkey-201g16.1   | <b>sgsm1a</b>         | rhbd13            |
| <b>oct-2</b>        | tas2r200.1         | TMEM120A          | si:ch211-215p11.3  | <b>cthl</b>           | si:ch1073-365p7.2 |
| <b>iggap2</b>       | si:dkey-71b5.7     | vmo1b             | si:dkey-16p6.1     | <b>mcm6l</b>          | si:ch211-285c6.6  |
| <b>pomt1</b>        | AL953841.1         | si:ch211-244b2.4  | znf1016            | <b>gbgt113</b>        | zgc:174357        |
| <b>EVA1A</b>        | BX511268.1         | acanb             | dydc2              | <b>asah1a</b>         | znf1091           |
| <b>ccka</b>         | irgq1              | si:ch211-283g2.1  | znf1133            | <b>mtmr7a</b>         | CT737127.1        |
| <b>itgb1a</b>       | znf977             | tnni1b            | FO704822.1         | <b>ggact.2</b>        | znf1121           |
| <b>vwa5a</b>        | si:ch1073-164k15.3 | plekhh1           | AL645691.1         | <b>fzd8b</b>          | CR769778.1        |
| <b>loxhd1b</b>      | vwa3a              | tent5ab           | si:dkey-26i24.1    | <b>zgc:101562</b>     | BX572103.1        |
| <b>smim1</b>        | mmd2a              | zgc:136870        | FP074874.1         | <b>ca15b</b>          | BX088712.5        |
| <b>ccser1</b>       | znf1064            | CU657980.1        | si:ch211-106f21.1  | <b>C18H3orf33</b>     | AL928650.4        |
| <b>ikbip</b>        | hbae1.3            | itih3a            | pcdh1g22           | <b>zmp:0000000634</b> | si:dkey-29p23.1   |
| <b>nrip2</b>        | znf1000            | si:ch211-256m1.8  | dnaaf2             | <b>frt14</b>          | si:ch73-27e22.8   |
| <b>gfra3</b>        | znf1089            | si:ch211-212k18.7 | il17ra1b           | <b>myl2b</b>          | si:ch211-133h13.1 |
| <b>STRADB</b>       | CR626886.1         | si:ch211-201h21.5 | znf993             | <b>ism2b</b>          |                   |
| <b>cobll1a</b>      | si:dkeyp-73b11.8   | si:ch211-274f20.2 | si:dkey-56m15.5    | <b>mustn1a</b>        |                   |
| <b>dio2</b>         | si:dkey-16p6.1     | si:dkey-19a16.2   | si:dkey-246j6.3    | <b>prss60.2</b>       |                   |
| <b>pnpla3</b>       | si:zfoss-364h11.2  | BX323861.3        | CT978957.2         | <b>cdh10a</b>         |                   |
| <b>MCOLN3</b>       | znf1020            | si:ch211-212k5.1  | pcyt1bb            | si:ch73-213k20.5      |                   |
| <b>gata6</b>        | si:dkey-20i20.9    | si:ch211-223a21.6 | CR381540.3         | <b>ttc29</b>          |                   |
| <b>fancm</b>        | AL935153.1         | BX927193.2        | BX950868.2         | si:ch73-14h1.2        |                   |
| <b>il6r</b>         | cenpv              | znf1116           | grem1b             | <b>zgc:154006</b>     |                   |
| <b>adgrg1</b>       | vtg7               | CABZ01021599.1    | leap2              | <b>coq7</b>           |                   |
| <b>tmem17</b>       | znf1151            | LO018029.2        | si:ch211-238e22.8  | CABZ01083448.1        |                   |
| <b>prkacba</b>      | si:ch211-234c11.2  | znf974            | znf1131            | <b>ggact.3</b>        |                   |
| <b>myhb</b>         | si:ch211-139g16.8  | mmp13a            | zgc:112146         | <b>mhc1uba</b>        |                   |
| <b>acsl1b</b>       | proca              | BX324142.1        | BX324216.2         | si:ch211-81n22.1      |                   |
| <b>nxnl2</b>        | si:dkey-56m15.6    | znf1026           | zgc:174944         | si:ch211-11p18.6      |                   |
| <b>faima</b>        | CR749748.1         | si:dkey-40n15.1   | si:dkey-23a13.2    | <b>gpr137bb</b>       |                   |
| <b>klhl42</b>       | ms4a17a.9          | si:dkey-5i16.5    | znf1108            | <b>rnfl65a</b>        |                   |
| <b>agpat9l</b>      | si:dkey-106c17.2   | ms4a17a.17        | INSYN2A            | si:ch211-226h8.4      |                   |
| <b>sult1st6</b>     | si:dkey-82i20.2    | si:ch211-255f4.11 | si:ch211-234c11.2  | si:ch211-22k7.9       |                   |
|                     |                    | CR318673.1        | znf1030            | <b>AL935044.1</b>     |                   |
|                     |                    |                   | zgc:173720         | CABZ01077218.1        |                   |
|                     |                    |                   | BX324003.2         | <b>zgc:173705</b>     |                   |

Supplement Table S2. List of primers used for qRT-PCR validation

| Primer Names            | Sequence (5'-3')         |
|-------------------------|--------------------------|
| <i>actb1</i> -qPCR-F    | GAGCAGGAGATGGGAACC       |
| <i>actb1</i> -qPCR-R    | CAACGGAAACGCTCATTGC      |
| <i>xpc</i> -qPCR-F      | GCGGCGAATGATGAATCGCTTT   |
| <i>xpc</i> -qPCR-R      | ATGACAAGGCCACAGCCAACAG   |
| <i>acs11b</i> -qPCR-F   | TCCTTCTCCGTTAGCAGCGTA    |
| <i>c3a.1</i> -qPCR-F    | GGCTGGGCAGTCAGCATTAT     |
| <i>c3a.1</i> -qPCR-R    | CTTCCTTCTACAGCCAGCTCAA   |
| <i>c3a.6</i> -qPCR-F    | ACATGCGTTTGTGGTGTGTTGG   |
| <i>c3a.6</i> -qPCR-R    | AGTATGGTCTGCTTGGTCAGC    |
| <i>cacna1fa</i> -qPCR-F | AGAGAAGGCAGTGTGTGCG      |
| <i>cacna1fa</i> -qPCR-R | TTCATCATCTTTTTCTTGGCCACC |
| <i>cldn7a</i> -qPCR-F   | AGCAACCCGAGCTTTGATGA     |
| <i>cldn7a</i> -qPCR-R   | TTATGGGCAAACACGAGCA      |
| <i>myl9b</i> -qPCR-F    | ACCAGTCGCAGATCCAGGAG     |
| <i>myl9b</i> -qPCR-R    | GCGAAGGCATTTCTGATGACG    |
| <i>prkacba</i> -qPCR-F  | TGCTGGACCTCATCTACAGGG    |
| <i>prkacba</i> -qPCR-R  | TGGTGCCAGGTATTCTGGTGT    |
| <i>psap</i> -qPCR-F     | CATTTTCGCAGCAGGTGGTTTC   |
| <i>psap</i> -qPCR-R     | CAGAGGCTCGTACTGCTCAATC   |
| <i>bmp7a</i> -qPCR-F    | GCTTTGCGAATACAGTGGA      |
| <i>bmp7a</i> -qPCR-R    | GAGAAAGGTCAAATCTGAACTCTC |
| <i>mogat2</i> -qPCR-F   | CCATTAGGCTGATAAAGACGG    |
| <i>mogat2</i> -qPCR-R   | CCACGAGAATACCATGAGGA     |
| <i>asah1a</i> -qPCR-F   | CACTGTAAATCTTGATTTGCCC   |
| <i>asah1a</i> -qPCR-R   | ACCATTTCGATCAACTCTGTG    |
